# Supplementary material
Source: PubMed Central journal article supplement (PMC4424675)

## SUPPLEMENTARY MATERIAL

### MRI-based computational modeling of blood flow and nanomedicine deposition in patients with peripheral arterial disease

Shaolie S. Hossain<sup>1,\*</sup>, Yongjie Zhang<sup>2</sup>, Xiaoyi Fu<sup>2</sup>, Gerd Brunner<sup>3,4</sup>, Jaykrishna Singh<sup>1</sup>, Thomas J. R. Hughes<sup>5</sup>, Dipan Shah<sup>3</sup>, Paolo Decuzzi<sup>1,\*</sup>

<sup>1</sup>Department of Translational Imaging and Department of Nanomedicine, Houston Methodist Research Institute, Houston, TX

<sup>2</sup>Department of Mechanical Engineering, Carnegie Mellon University, Pittsburgh, PA

<sup>3</sup>Methodist DeBakey Heart & Vascular Center, Houston Methodist Research Institute, Houston, TX

<sup>4</sup>Division of Atherosclerosis and Vascular Medicine, Department of Medicine, Baylor College of Medicine, Houston, TX

<sup>5</sup>Institute for Computational Engineering and Sciences, The University of Texas at Austin, Austin, TX

\*Currently at Department of Molecular Cardiology, Texas Heart Institute, Houston, TX

**Supplementary Figure 1** Blood flow features at peak velocity during systole at **A)** baseline and **B)** 24-months post-intervention. Streamlines depicting flow direction (arrows) are presented along with velocity magnitude contours at cross-sections taken at a (I) proximal, a (II) distal and an (III) intermediate (“mean”) location near the constriction.

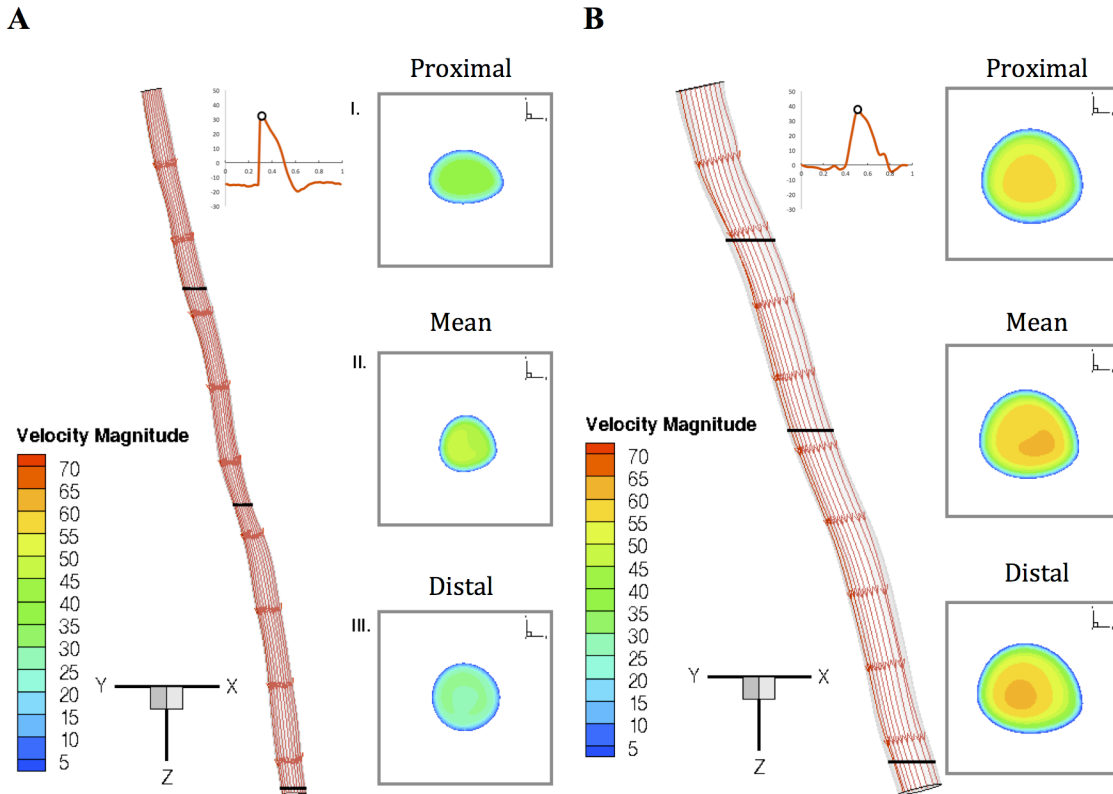

**Supplementary Figure 2A:** The blood velocity profiles represent right limb at baseline for a I) proximal (solid) and a II) distal (dashed) location. Velocities are obtained from phase contrast (PC) sequences with cardiac cycle duration of 1 s and represent mean values averaged over the luminal cross-section of the superficial femoral artery (SFA).

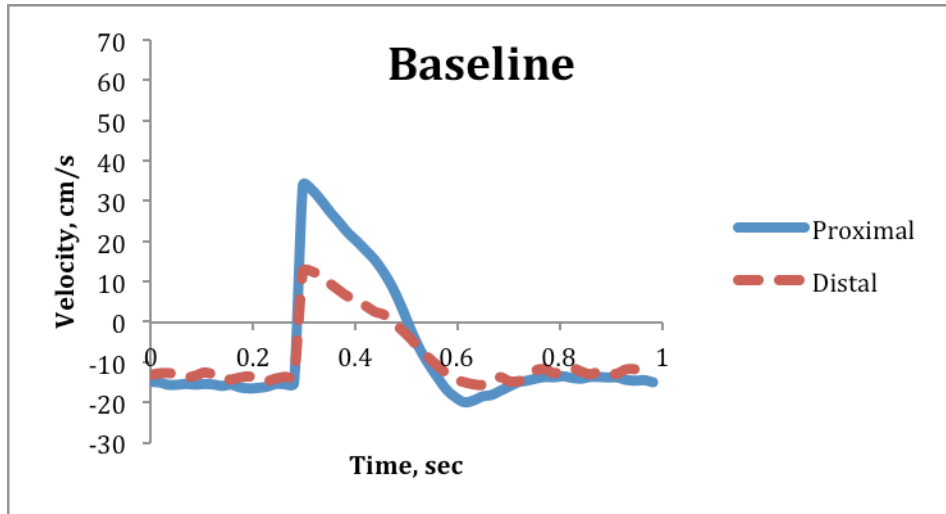

**Supplementary Figure 2B** Blood flow rate measured over a cardiac cycle at baseline (solid) and 24-months post-intervention (dots), resulting in an approximately 500% increase in peak flow rate.

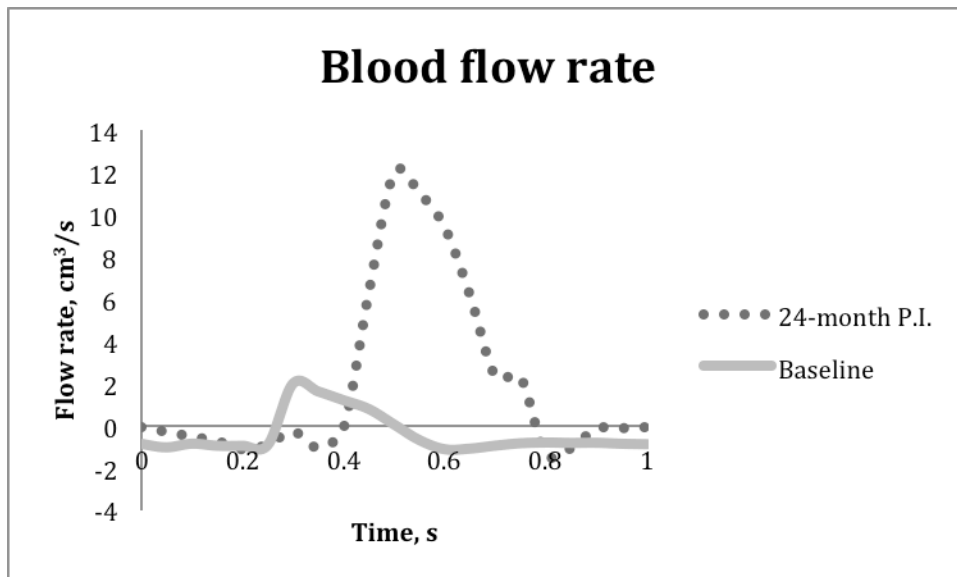

**Supplementary Figure 2C:** The blood velocity profiles represent right limb at 24-months post-intervention (P.I.) for a I) proximal (solid) and a II) distal (dashed) location. Velocities are obtained from PC sequences with cardiac cycle duration of 1 s and represent mean values averaged over the luminal cross-section of the SFA.

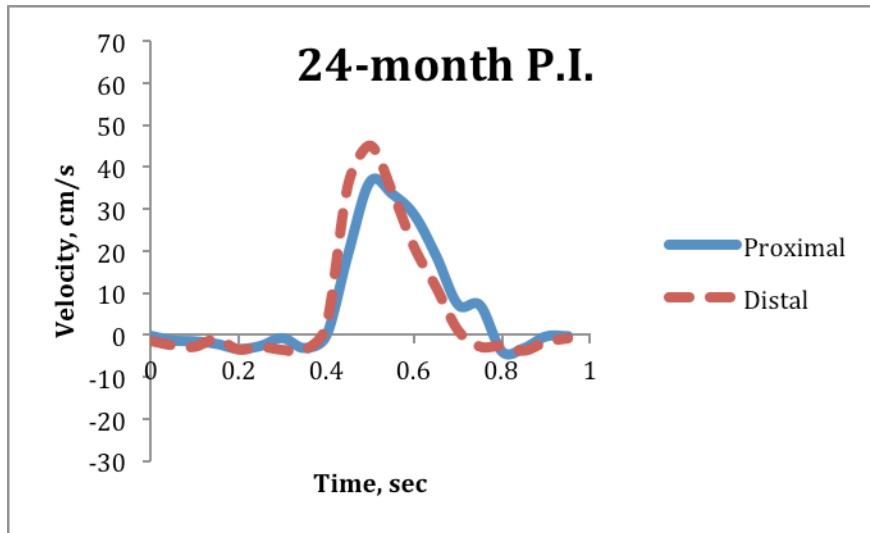

**Table S1:** Statistical quantities associated with TAWSS and OSI distributions

|            | Case     | Mean   | Skewness | Kurtosis |
|------------|----------|--------|----------|----------|
| <b>WSS</b> | Baseline | 2.7364 | 1.2744   | 4.8735   |
|            | 24 Mo PI | 2.1265 | 0.2319   | 2.1409   |
| <b>OSI</b> | Baseline | 0.2982 | 0.1009   | 2.8409   |
|            | 24 Mo PI | 0.2261 | 0.6150   | 2.6449   |

**Supplementary Figure 3** Two different contours, (a) OSI and (b) WSS concentration (normalized), are merged (c) for both baseline (top) and 24-months post-intervention configurations. Here the unrolled geometries are presented. Bright yellow regions in (c) indicate low WSS along with higher OSI values.

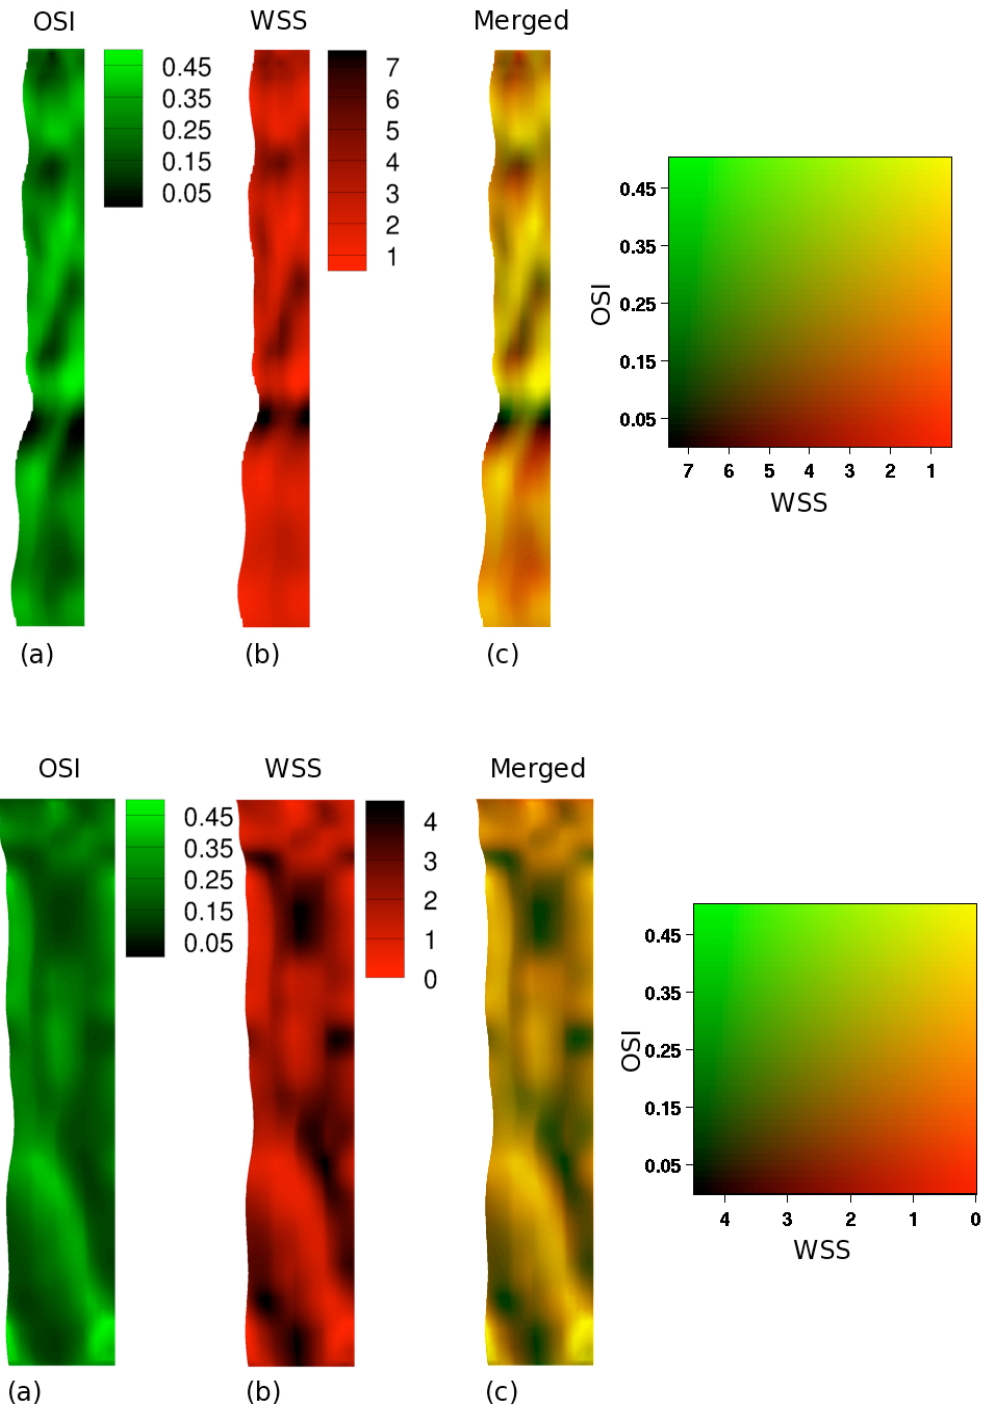

**Supplementary Figure 4:** Time evolution of particle ( $d_p = 100$  nm) volumetric concentration (in blood) at baseline normalized by its concentration at the inlet  $C^0$ .

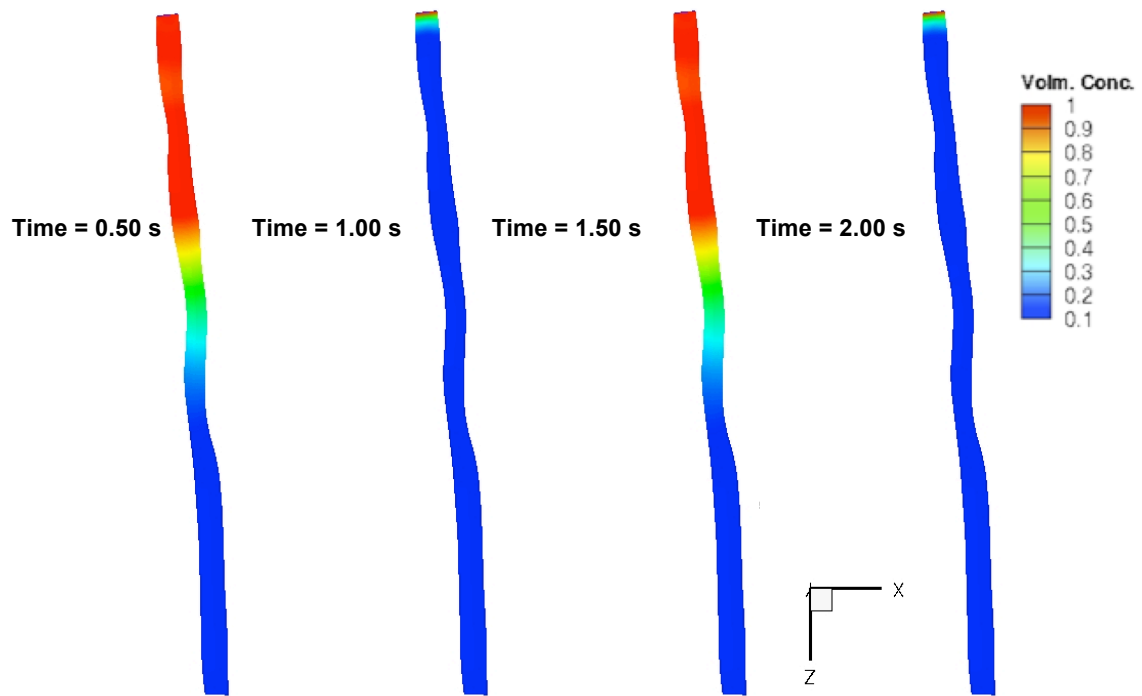

**Supplementary Figure 5:** Time evolution of particle ( $d_p = 100$  nm) volumetric concentration (in blood) at 24-months post-intervention normalized by its concentration at inlet  $C^0$ .

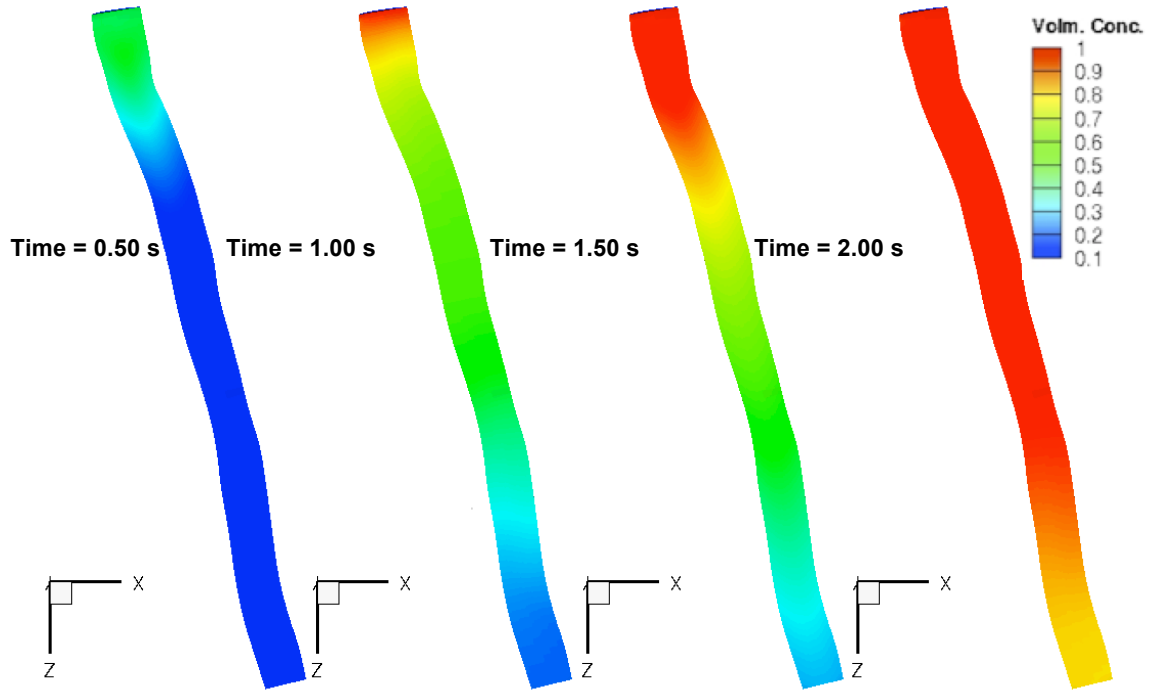

**Supplementary Figure 6:** Spatial distribution of VCAM-1 expression at **A)** baseline and **B)** 24-months post-intervention. The quantities are reported as a factor of unstimulated VCAM-1 expression under static conditions ( $mr/mr_0$ )

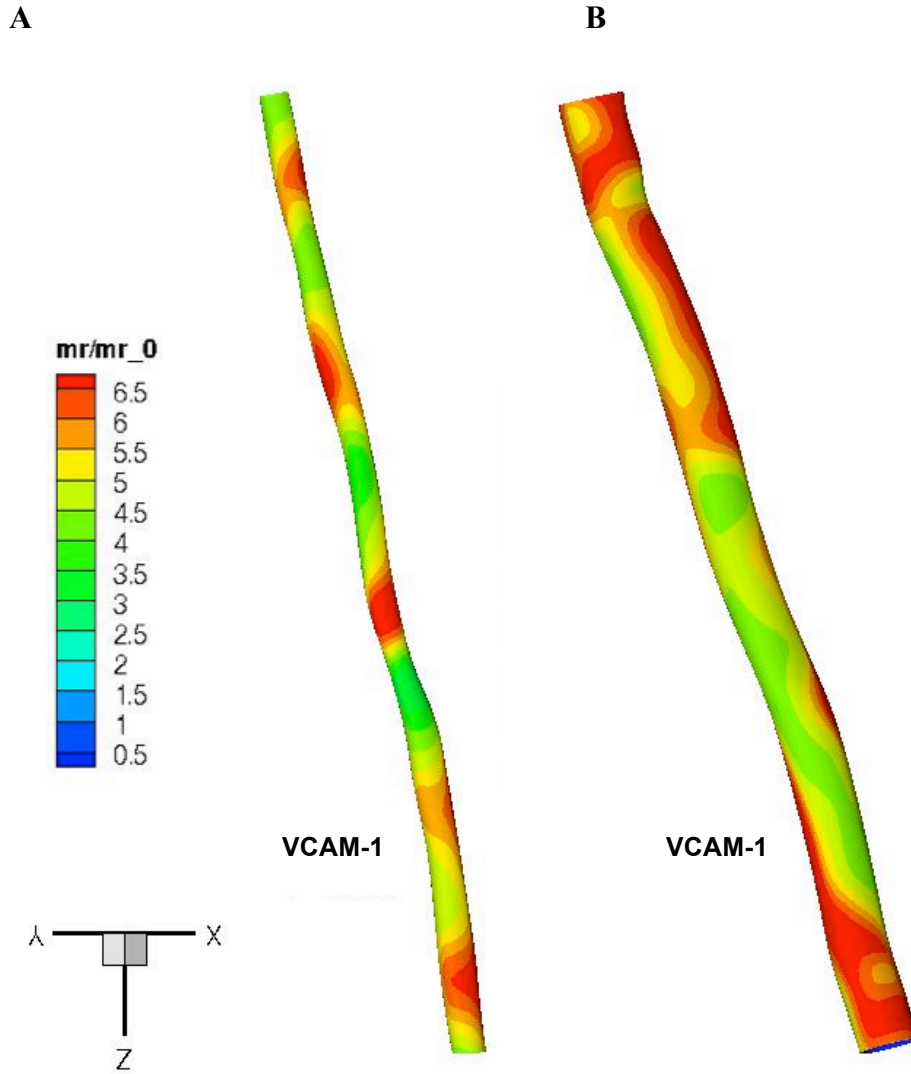

**Supplementary Figure 7:** Spatial distribution pattern for particles at baseline when receptor density is a function of local wall shear stress. Side by side comparison of **A)** ICAM-1, **B)** VCAM-1 and **C)** E-selectin directed particles in terms of their surface density ( $\#/cm^2$ ) at  $t = 10$  s. Here particles were released in silico for 10 cardiac cycles from an NP bolus placed at the inlet.

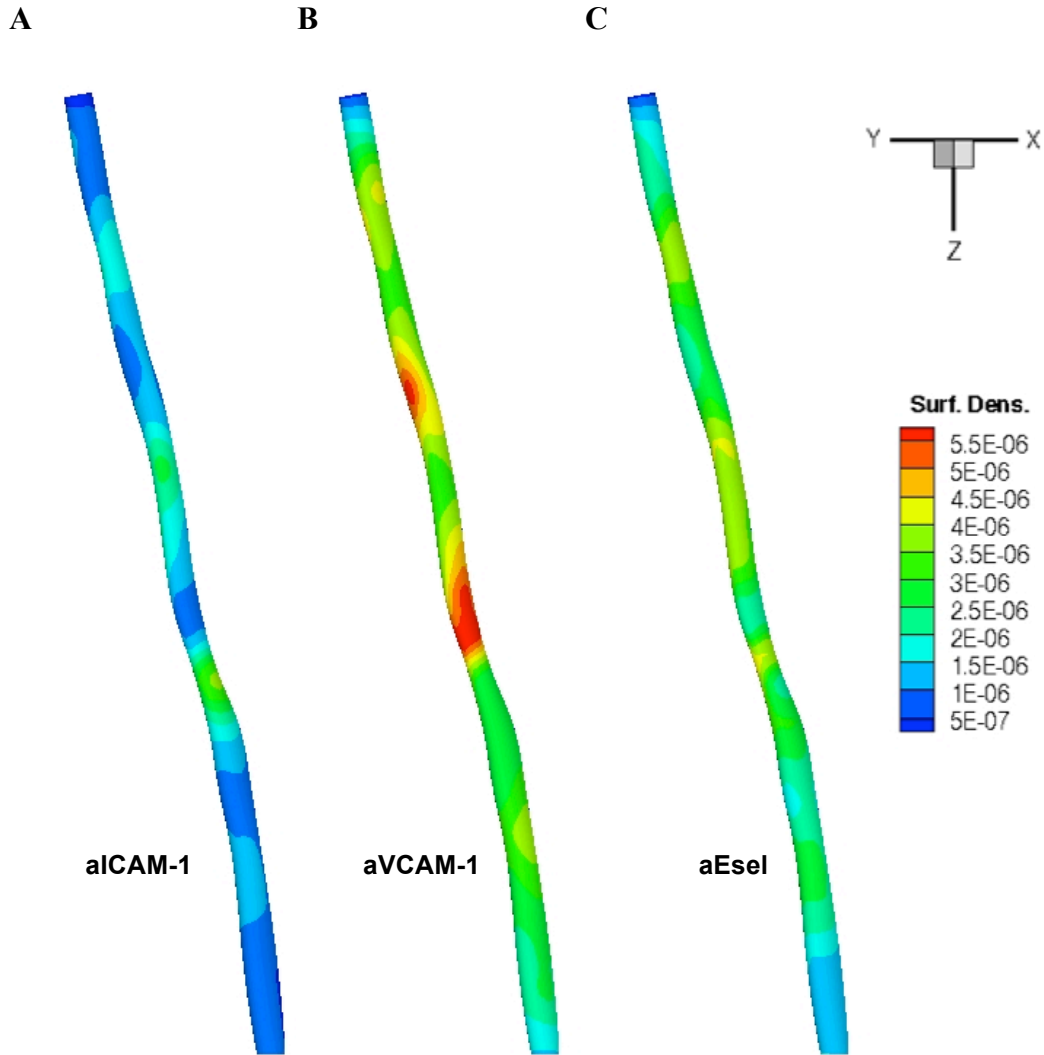



**Supplementary Figure 8:** Spatial distribution pattern for targeted particles at 24-months post-intervention when receptor density is a function of local shear stress. Side by side comparison of ICAM-1, VCAM-1 and E-selectin directed particles in terms of their surface density ( $\#/cm^2$ ) at  $t = 10$  s. Here particles were released in silico for 10 cardiac cycles from an NP bolus placed at the inlet.

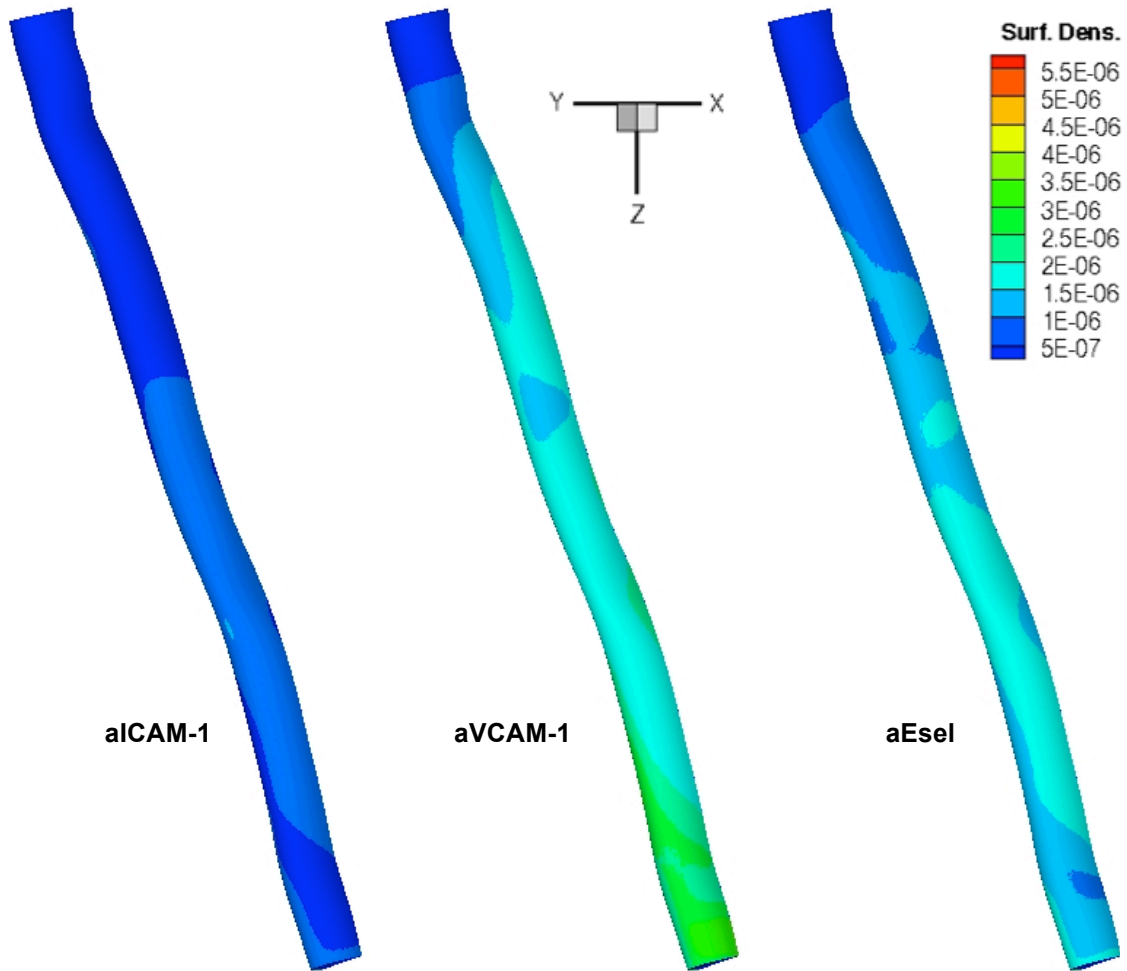

**Supplementary Figure 9** aVCAM-1, aICAM-1 and aEsel NP distribution at Baseline (dark grey) and 24-months post-intervention (24M PI). Each bar of the histograms represents the amount of normalized area with a defined range of NP surface density (1e-6 NPs/cm<sup>2</sup>). Here, the x-axis labels denote the upper bound of each range of NP density. For example, 1 represents a surface density of 10<sup>-6</sup> NPs per square centimeters.

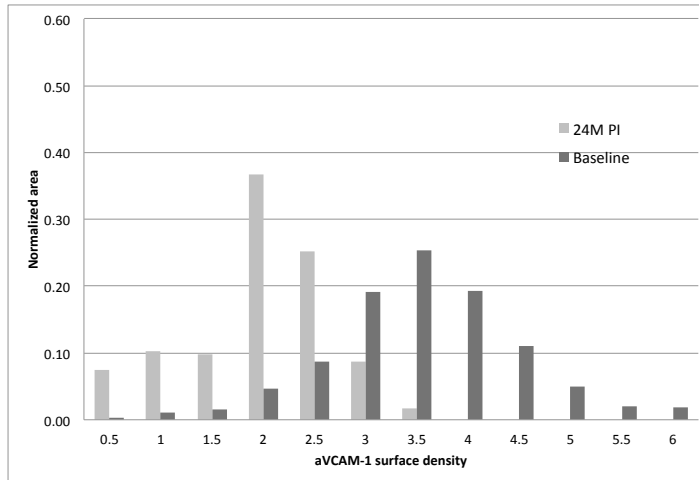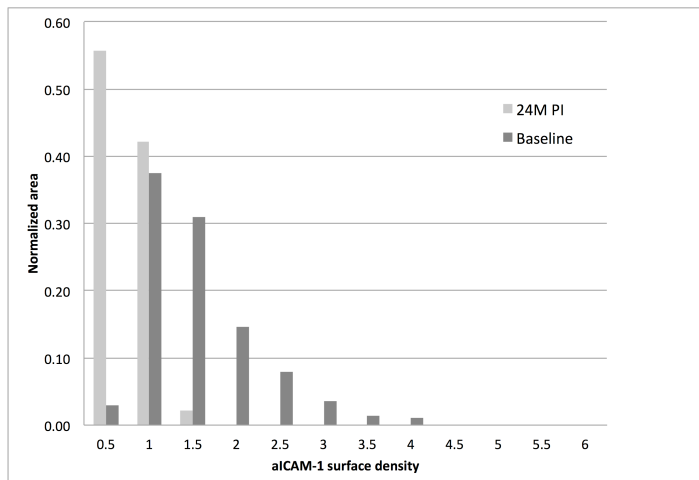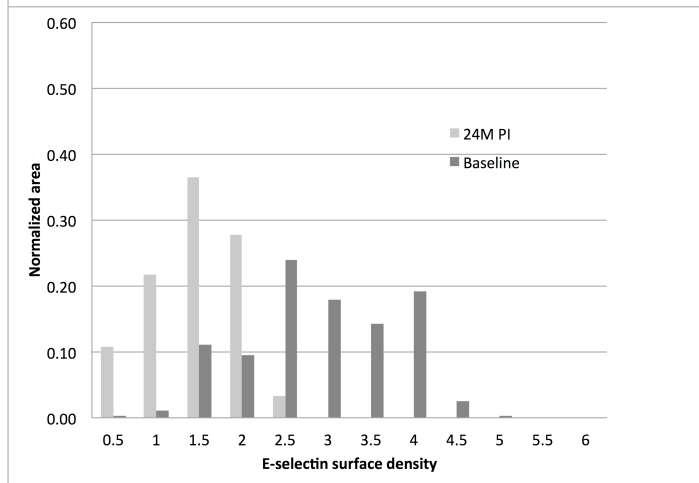

**Supplementary Figure 10** Two different contours, (a) WSS and (b) aVCAM-1 concentration (normalized), are merged (c) for both baseline (top) and 24-months post-intervention configurations. Here the unrolled geometries are presented. Bright yellow regions in (c) indicate low WSS along with higher concentrations of aVCAM-1.

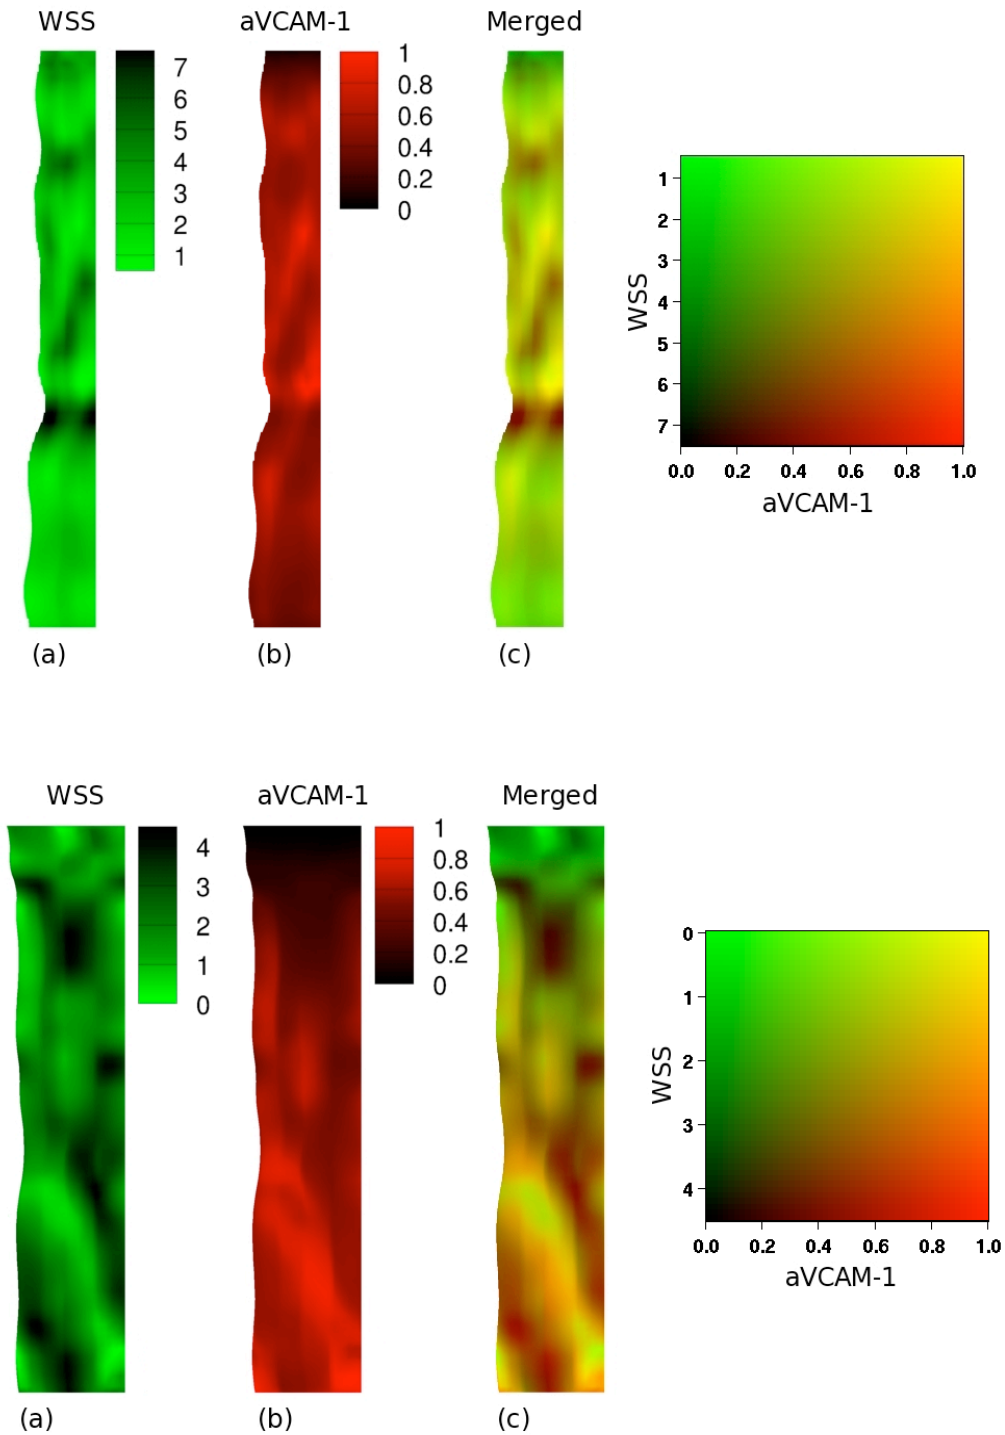

**Supplementary Figure 11** Two different contours, (a) RRT and (b) aVCAM-1 concentration (normalized), are merged (c) for both baseline (top) and 24-months post-intervention cases. Here the unrolled geometries are presented. Bright yellow regions in (c) indicate high RRT along with higher concentrations of aVCAM-1. Note RRT values 5 and above were ignored.

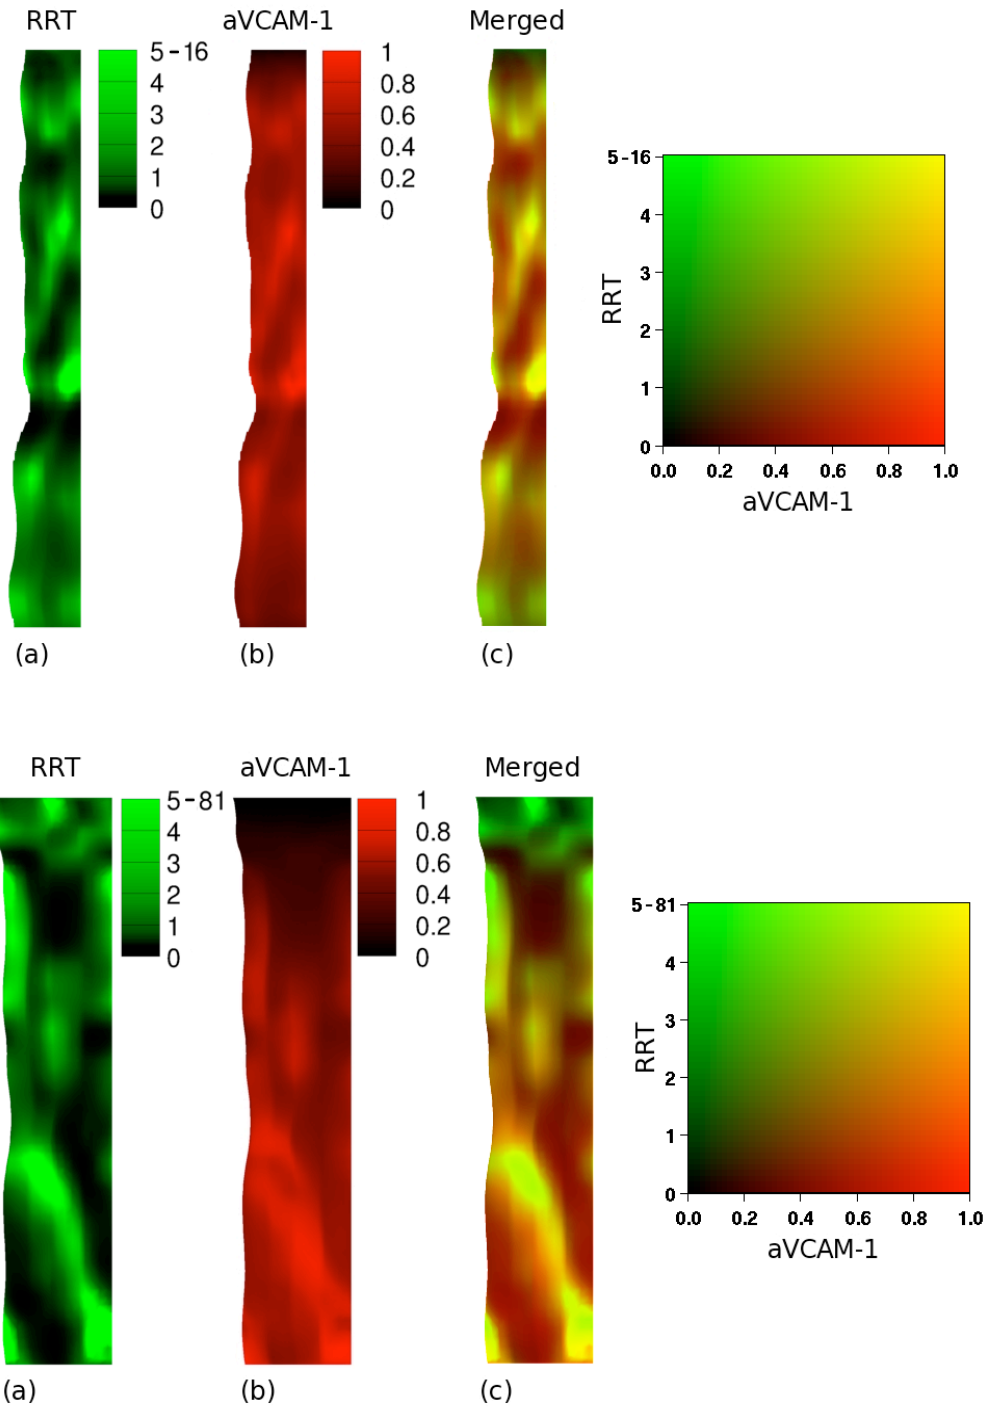

Supplement: rsif20150001supp1.pdf [file rsif20150001supp1.pdf]
